# Supplementary material for: The gene encoding Arabidopsis acyl-CoA-binding protein 3 is pathogen inducible and subject to circadian regulation
Source: PubMed Central journal article supplement — J Exp Bot. 2012 Feb 15;63(8):2985–3000. doi: 10.1093/jxb/ers009 (PMC3350915; doi:10.1093/jxb/ers009), 2012-02-15
Supplement: supp_ers009_00072421-file001.pdf [file supp_ers009_00072421-file001.pdf]

**The gene encoding *Arabidopsis* Acyl-CoA-Binding Protein 3 is pathogen-inducible and subject to circadian regulation**

**Shu-Xiao Zheng, Shi Xiao, Mee-Len Chye**

**Supplementary Figure legends**

**Figure S1** Nucleotide sequence of the *ACBP3* 5'-flanking region. Nucleotide numbers begin at the 5'-end of the *ACBP3* flanking region. Upward and downward arrows indicate, respectively, the positions of the primers used corresponding to the boundaries of the truncated promoter fragments (5'-end deletions). The TATA-box is in bold and underlined, the transcriptional start site (nucleotide A) is in bold and marked as +1. The translation initiation codon is in bold italic letters. The other predicted *cis*-elements are named above nucleotide sequences and are shown in gray-filled boxes.

**Table S1** Oligonucleotide primers used in this study for PCR walking, sequence analysis, EMSAs and DNase I footprinting.

Supplemental Figure S1

ML809

-1500 TGTGTCACAA AAAAAACACA GGCCCAAAGG ATACAAATAC AAGCCCAAAT  
 →

-1451 CCCAACATAT ACAAATGCAC AACCTATATT GTGATATATA TATATATATA  
 -1401 TATATATAGA TCGAAGCGAA TATCCGACTT TAGAAAAAAT AGTATTTGTT  
 -1351 ATTTGCTTCG GTTTTTACGA TTACTACATT TTTCTATTTG CTTTGCTCCA  
 -1301 AAATCTTACG AATATTCGGA TTTTTCGAAT CAAATCAAAT CGAATATTGA  
 -1251 GTTAAAGCGG ATCGAACGAA TATTTTGTCC AGGACTAGTG AAGGTTGTGG  
 -1201 ACGTTCACG TGTCCCTAGC TTATTATTAT TGGTCTGACA CGTCTATAGC  
 -1151 TTATCTCTTC TTTTGTGTCG TATGAGCCTT TATATGTGGG ATGTCTTGGG  
 -1101 CTTTATTTTG GTTTTCTCAT AACCAAGCAT TGTACTGGTA ATGATAAAAAT

**EE** **EE**

-1051 GAATAAAATA TTA CACTTAT GAGAAAAAAA AAAAAAAA GATGCTAAAA  
 -1001 ATATTACATA TTTATGCAGA ATATAGAATA AATCACACAT ACTGATTTAA  
 -951 TAAATGCTCT ATCAACTCTG ATATATAAGG AGATTTTGAA AAGAAAAAAA  
 -901 CAAAGAGGAG ACTTTTGTG TGCACAGTG ATTTTAGTAA TTTTGGCAAA  
 -851 GTTAAAGTTG CCTTTCTTTG TTTGGTAAAG TCGTTAGGGA AAGAAACAAA  
 -801 AACTTTTTAT TAGTGAAAAC CTCGTTAGAC TGATTTTTAA GTTTCTTCGT  
 -751 GAAGTGTGTT GTTACCCATT TATCAAGTTT TTTTAAACCG TAGTTGAGCA  
 -701 AATAAGGACG AGTGTCATGA TTGTGGTTCC GTCACAACT TATCGACTGG

ML968

-651 GTTTGGCCAT GTAGGTGAAT AGGTAGGAAG ACATGGGCCT TAGTCTTATC  
 → **P-box**

-601 ATATTATGCA TTAACATAGG CCCATGTTTT GTTGTAAAG GCCCAAATA  
 → **S-box**

ML969

-551 ACTATGAACT GTCCTTGCAT ATTACCTCAA AAACCTTTAA TCTCTCTTTT  
 -501 GGTCTTGTT TCTATTTCCA TTTCTATACC ATTCAAACCT ATAACCTAAT

**INR** **ML970** **GT-1 cis-element**

-451 TTCAGCATCA TTAAAGCTTG GAATGGGAGT AATTTTCAAT GAGCTGGTTT  
 → **CAAT-box**

-401 TGTGTTATTC AAAAAAATC ACTAAACATCAAAAT TAAGGAAATT  
 → **Dof-box** **Dof-box**

-351 AGTTTTCATA AAAGTGTGTT TTTTAAAGC CAGATTTTTA TCATACGAAA  
 → **ML971** **CAAT-box**

-301 ATCCAAAAA AAAAAAAA AAAAAATTA AAAAACTCTT CCAATCATT  
 → **Dof-box** **Dof-box** **ML972**

-251 TTTTAGTTTG TAAAGAGTCC AAAGACAAAG ATCCAGTGAG AGCAAAAAA  
 → **Dof-box**

-201 AAAGCGGCGC GCTGCATAAG GATTAAGGAA GGAGCCGGTG AGGTGGAGAA  
 → **ML973**

-151 GAGGATAAGA ATAAAACCGC AAGAGCCAAG TCAGCAGTCA TAGCGGTTAG  
 → **TATA-box**

-101 GCGTTGAGAA AATATAATTG ACGGACCCGC TTCCCGTTTA AAGCCGAATA  
 -51 TGCTTTCTTC TTTGTCTCTC ATTTATTCCT TTTTCTTTTCT CTTCTTTTCT  
 +1 AACCTTTCGT ATAATTACAT TCTTTGCCTT TCTCCTTCTT CTTCTTTAGA  
 51 TCCTAAGTAT CTTACTTTCC TTTTTCATCA TCTTCTTCGA TCATGGAGGT  
 101 TTTCTTAGAG ATGCTTCTCA CGGCGGTTGT TGCTCTCTTG TTTTCTTTCC  
 151 TTTTGGCCAA GCTCGTTTCT GTTGCTACGG TGGAGAACGA TTTGAGTTCT  
 201 GATCAGCCGC TCAAGCCCGA GAT  
 →

ML810

**Table S1** Oligonucleotide primers used in this study for PCR walking, sequence analysis, EMSAs and DNase I footprinting

| Primer | Sequence (from 5' to 3')                        | Nucleotide location                               | Orientation | Description                                                                                                   |
|--------|-------------------------------------------------|---------------------------------------------------|-------------|---------------------------------------------------------------------------------------------------------------|
| ML809  | <u>AAGGATCC</u> AAATACAAGCCAAATCCCAAC           | -1475 to -1446 in <i>ACBP3</i> 5'-flanking region | Forward     | For construction of pAT436, added <i>Bam</i> HI restriction site underlined                                   |
| ML968  | <u>TAGGATCC</u> CATGGGCCTTAGTCTTATC             | -629 to -600 in <i>ACBP3</i> 5'-flanking region   | Forward     | For construction of pAT437, added <i>Bam</i> HI restriction site underlined                                   |
| ML969  | <u>CTGGATCC</u> GCATATTACCTCAAAAACC             | -543 to -517 in <i>ACBP3</i> 5'-flanking region   | Forward     | For construction of pAT438, added <i>Bam</i> HI restriction site underlined                                   |
| ML970  | <u>TTGGATCC</u> GGAGTAATTTTCAATGAGC             | -434 to -407 in <i>ACBP3</i> 5'-flanking region   | Forward     | For construction of pAT439, added <i>Bam</i> HI restriction site underlined                                   |
| ML971  | <u>TAGGATCC</u> CTCTTCCAATCATTA                 | -274 to -252 in <i>ACBP3</i> 5'-flanking region   | Forward     | For construction of pAT440, added <i>Bam</i> HI restriction site underlined                                   |
| ML972  | <u>AAGGATCC</u> AGTGAGAGCAAAAAAAAAAGCGGC        | -226 to -194 in <i>ACBP3</i> 5'-flanking region   | Forward     | For construction of pAT441, added <i>Bam</i> HI restriction site underlined                                   |
| ML973  | <u>GAGGATCC</u> GAATAAAACCGCAAGAGCCAAG          | -151 to -122 in <i>ACBP3</i> 5'-flanking region   | Forward     | For construction of pAT442, added <i>Bam</i> HI restriction site underlined                                   |
| ML810  | <u>ATCCCGGG</u> CTTGAGCGGCTGATCAGAAC            | +196 to +223 in <i>ACBP3</i> 5'-flanking region   | Reverse     | For construction of <i>ACBP3pro::GUS</i> deletion series, added <i>Sma</i> I restriction site underlined      |
| GUS-3' | TCCACAGTTTTTCGCGATCCA                           | +64 to +84 in pBI101.3                            | Reverse     | For identification of transgenic lines with <i>ACBP3</i> 5'-flanking sequence-specific forward primers by PCR |
| ML1112 | CATA <u>AAAGTGTG</u> TTTTTTAA <u>AGCCAG</u> ATT | -345 to -316 in <i>ACBP3</i> 5'-flanking region   | Forward     | For preparation of Gp-I-Dof-wt probe used in EMSAs, Dof-boxes underlined                                      |
| ML1113 | AATCTGG <u>CTTTTAAAAA</u> CACAC <u>TTTTATG</u>  | -345 to -316 in <i>ACBP3</i> 5'-flanking region   | Reverse     | For preparation of Gp-I-Dof-wt probe used in EMSAs, Dof-boxes underlined                                      |
| ML1114 | GTAAAGAGTCCAAAGACA <u>AAAGATCC</u>              | -242 to -218 in <i>ACBP3</i> 5'-flanking region   | Forward     | For preparation of Gp-II-Dof-wt probe used in EMSAs, Dof-boxes underlined                                     |
| ML1115 | CGGAT <u>CTTTGTCTTTGGACTCTTTA</u>               | -242 to -218 in <i>ACBP3</i> 5'-flanking region   | Reverse     | For preparation of Gp-II-Dof-wt probe used in EMSAs, Dof-boxes underlined                                     |
| ML1116 | AAAAAA <u>AGCGGCGCGC</u>                        | -206 to -190 in <i>ACBP3</i> 5'-flanking region   | Forward     | For preparation of Gp-III-Dof-wt probe used in EMSAs, Dof-box underlined                                      |
| ML1117 | GCGCGCC <u>GCTTTTTTTT</u>                       | -206 to -190 in <i>ACBP3</i> 5'-flanking region   | Reverse     | For preparation of Gp-III-Dof-wt probe used in EMSAs, Dof-box underlined                                      |
| ML1160 | CATAC <u>ACGTGTG</u> TTTTTTAAAGCCAGATT          | -345 to -316 in <i>ACBP3</i> 5'-flanking region   | Forward     | For preparation of Dof-(-341/-338)-mut probe used in EMSAs, mutated Dof-box (-341/-338) underlined            |
| ML1161 | AATCTGGCTTTTTAAAAACAC <u>ACGTGTATG</u>          | -345 to -316 in <i>ACBP3</i> 5'-flanking region   | Reverse     | For preparation of Dof-(-341/-338)-mut probe used in EMSAs, mutated Dof-box (-341/-338) underlined            |
| ML1162 | CATAAAAGTGTGTTTTTTAC <u>AGCCAG</u> ATT          | -345 to -316 in <i>ACBP3</i> 5'-flanking region   | Forward     | For preparation of Dof-(-326/-323)-mut probe used in EMSAs, mutated Dof-box (-326/-323) underlined            |

|        |                                         |                                                          |         |                                                                                                                     |
|--------|-----------------------------------------|----------------------------------------------------------|---------|---------------------------------------------------------------------------------------------------------------------|
| ML1163 | AATCTGGC <u>GTG</u> TAAAAAACACACTTTTATG | -345 to -316<br>in <i>ACBP3</i><br>5'-flanking<br>region | Reverse | For preparation of Dof(-326/-323)-mut probe used in EMSAs, mutated Dof-box (-326/-323) underlined                   |
| ML1198 | CAATGAGCTGGTTTTTGTATTTC                 | -415 to -392<br>in <i>ACBP3</i><br>5'-flanking<br>region | Forward | For preparation of GT-1(-406/-401)-wt probe used in EMSAs, GT-1 <i>cis</i> -element (-406/-401) underlined          |
| ML1199 | GAAATAACA <u>AAAACC</u> AGCTCATTG       | -415 to -392<br>in <i>ACBP3</i><br>5'-flanking<br>region | Reverse | For preparation of GT-1(-406/-401)-wt probe used in EMSAs, GT-1 <i>cis</i> -element (-406/-401) underlined          |
| ML1200 | CAATGAGCTCCTTTTTGTATTTC                 | -415 to -392<br>in <i>ACBP3</i><br>5'-flanking<br>region | Forward | For preparation of GT-1(-406/-401)-mut probe used in EMSAs, mutated GT-1 <i>cis</i> -element (-406/-401) underlined |
| ML1201 | GAAATAACA <u>AAAAGG</u> AGCTCATTG       | -415 to -392<br>in <i>ACBP3</i><br>5'-flanking<br>region | Reverse | For preparation of GT-1(-406/-401)-mut probe used in EMSAs, mutated GT-1 <i>cis</i> -element (-406/-401) underlined |
| ML1451 | CCTCAAAAACCTT <u>TAA</u> TCTCTC         | -527 to -506<br>in <i>ACBP3</i><br>5'-flanking<br>region | Forward | For preparation of S-box(-516/-512)-wt probe used in EMSAs, S-box (-516/-512) underlined                            |
| ML1452 | GAGAGAT <u>TAAAGG</u> TTTTGAGG          | -527 to -506<br>in <i>ACBP3</i><br>5'-flanking<br>region | Reverse | For preparation of S-box(-516/-512)-wt probe used in EMSAs, S-box (-516/-512) underlined                            |
| ML1453 | CCTCAAAAACCCAG <u>TCT</u> CTCTC         | -527 to -506<br>in <i>ACBP3</i><br>5'-flanking<br>region | Forward | For preparation of S-box(-516/-512)-mut probe used in EMSAs, mutated S-box (-516/-512) underlined                   |
| ML1454 | GAGAGAG <u>ACTGG</u> TTTTGAGG           | -527 to -506<br>in <i>ACBP3</i><br>5'-flanking<br>region | Reverse | For preparation of S-box(-516/-512)-mut probe used in EMSAs, mutated S-box (-516/-512) underlined                   |
| ML1171 | TCAGCATCATTAAAGCTTGG                    | -450 to -431<br>in <i>ACBP3</i><br>5'-flanking<br>region | Forward | 5'-end labeled with 6-FAM for preparation of DNase I footprinting probe                                             |
| ML1172 | GAATAGGAGAAGAGGTGGAG                    | -162 to -143<br>in <i>ACBP3</i><br>5'-flanking<br>region | Reverse | 5'-end labeled with NED for preparation of DNase I footprinting probe                                               |
